# Supplementary material
Source: MDPI journal article supplement (https://www.mdpi.com/search?q=cancers-11-00741)
Supplement: s001 [file cancers-11-00741-s001.pdf]

# From a Philosophical Framework to a Valid Prognostic Staging System of the New “Comprehensive Assessment” for Transplantable Hepatocellular Carcinoma

Stefano Di Sandro, Vincenzo Bagnardi, Alessandro Cucchetti, Andrea Lauterio, Riccardo De Carlis, Laura Benuzzi, Maria Danieli, Francesca Botta, Leonardo Centonze, Marc Najjar and Luciano De Carlis MD

Table S1. Transplanted patients’ characteristics (N = 330).

|                                                   |         | Transplanted PTs   |                            |                     | P <sup>1</sup> |
|---------------------------------------------------|---------|--------------------|----------------------------|---------------------|----------------|
|                                                   |         | Low Risk (N = 108) | Intermediate Risk (N = 63) | High Risk (N = 159) |                |
| <b>Characteristics of PTs</b>                     |         |                    |                            |                     |                |
| Age, median (IQR)                                 |         | 57 (52–61)         | 57 (53–61)                 | 57 (52–62)          | 0.80           |
| Sex, N (%)                                        | Men     | 91 (84)            | 52 (83)                    | 146 (92)            | 0.07           |
|                                                   | Women   | 17 (16)            | 11 (17)                    | 13 (8)              |                |
| Presence of HCV, N (%)                            | No      | 47 (44)            | 23 (37)                    | 55 (35)             | 0.33           |
|                                                   | Yes     | 61 (56)            | 40 (63)                    | 104 (65)            |                |
| Presence of HBV, N (%)                            | No      | 79 (73)            | 48 (76)                    | 124 (78)            | 0.66           |
|                                                   | Yes     | 29 (27)            | 15 (24)                    | 35 (22)             |                |
| Abuse of alcohol, N (%)                           | No      | 74 (69)            | 44 (70)                    | 117 (74)            | 0.64           |
|                                                   | Yes     | 34 (31)            | 19 (30)                    | 42 (26)             |                |
| Other cause of cirrhosis, N (%) <sup>2</sup>      | No      | 105 (97)           | 59 (94)                    | 149 (94)            | 0.40           |
|                                                   | Yes     | 3 (3)              | 4 (6)                      | 10 (6)              |                |
| <b>Parameters at listing</b>                      |         |                    |                            |                     |                |
| AFP (ng/mL), median (IQR)                         |         | 8 (5–20)           | 8 (4–14)                   | 9 (4–25)            | 0.31           |
|                                                   | Missing | 6                  | 1                          | 12                  |                |
| Number of nodules, median (IQR)                   |         | 1 (1–1)            | 2 (1–2)                    | 1 (1–2)             | <0.0001        |
| Diameter of the largest nodule (mm), median (IQR) |         | 20 (15–27)         | 23 (16–35)                 | 24 (16–30)          | 0.04           |
|                                                   | Missing | 6                  | 3                          | 7                   |                |
| MELD score, N (%)                                 | ≤9      | 34 (32)            | 15 (25)                    | 61 (39)             | 0.0005         |
|                                                   | 10–19   | 67 (62)            | 35 (57)                    | 91 (59)             |                |
|                                                   | 20–29   | 4 (4)              | 10 (16)                    | 3 (2)               |                |
|                                                   | ≥30     | 2 (2)              | 1 (2)                      | 0 (0)               |                |
|                                                   | Missing | 1                  | 2                          | 4                   |                |
| CHILD score, N (%)                                | A       | 46 (47)            | 17 (31)                    | 92 (62)             | <0.0001        |
|                                                   | B       | 39 (40)            | 21 (39)                    | 51 (34)             |                |
|                                                   | C       | 13 (13)            | 16 (30)                    | 6 (4)               |                |
|                                                   | Missing | 10                 | 9                          | 10                  |                |
| Macrovascular invasion, N (%)                     | No      | 102 (98)           | 57 (100)                   | 146 (98)            | 0.56           |
|                                                   | Yes     | 2 (2)              | 0 (0)                      | 3 (2)               |                |
|                                                   | Missing | 4                  | 6                          | 10                  |                |
| Tumor classification, N (%)                       | T1–T2   | 102 (100)          | 43 (72)                    | 119 (78)            | <0.0001        |
|                                                   | T3–T4   | 0 (0)              | 17 (28)                    | 33 (21)             |                |
|                                                   | Missing | 6                  | 3                          | 7                   |                |
| <b>Parameter at the last restaging</b>            |         |                    |                            |                     |                |
| Restaging, N (%)                                  | TT0c    | 6 (5.6)            |                            |                     |                |
|                                                   | TT0L    | 93 (86.1)          |                            |                     |                |

|                                                          |                   | Transplanted PTs   |                            |                     | <i>P</i> <sup>1</sup> |
|----------------------------------------------------------|-------------------|--------------------|----------------------------|---------------------|-----------------------|
|                                                          |                   | Low Risk (N = 108) | Intermediate Risk (N = 63) | High Risk (N = 159) |                       |
|                                                          | TT1               | 9 (8.3)            | -                          | -                   |                       |
|                                                          | TT0 <sub>NT</sub> |                    | 15 (23.8)                  |                     |                       |
|                                                          | TT <sub>FR</sub>  |                    | 32 (50.8)                  |                     |                       |
|                                                          | TT <sub>UT</sub>  |                    | 16 (25.4)                  |                     |                       |
|                                                          | TT <sub>PR</sub>  |                    |                            | 80 (50.3)           |                       |
|                                                          | TT <sub>DR</sub>  |                    |                            | 79 (49.7)           |                       |
| AFP (ng/mL), median (IQR)                                |                   | 8 (3–36)           | 8 (4–17)                   | 8 (3–39)            | 0.98                  |
|                                                          | <i>Missing</i>    | 9                  | 3                          | 19                  |                       |
| Number of nodules, median (IQR)                          |                   | 0 (0–0)            | 1 (0–2)                    | 2 (1–3)             | <0.0001               |
|                                                          | <i>Missing</i>    | 4                  | 8                          | 13                  |                       |
| Diameter of the largest nodule (mm), median (IQR)        |                   | 15 (12–17)         | 21 (16–28)                 | 17 (14–21)          | 0.02                  |
|                                                          | <i>Missing</i>    | 1                  | 5                          | 13                  |                       |
| Time from the last TRT to restaging (days), median (IQR) |                   | 85 (44–217)        | 67 (5–177)                 | 115 (44–260)        | 0.52                  |
|                                                          | <i>Missing</i>    | 3                  | 0                          | 11                  |                       |
| MELD score, N (%)                                        | ≤9                | 34 (32)            | 20 (32)                    | 51 (32)             | 0.0014                |
|                                                          | 10–19             | 66 (61)            | 29 (46)                    | 98 (62)             |                       |
|                                                          | 20–29             | 4 (4)              | 13 (21)                    | 8 (5)               |                       |
|                                                          | ≥30               | 3 (3)              | 1 (2)                      | 1 (1)               |                       |
|                                                          | <i>Missing</i>    | 1                  | 0                          | 1                   |                       |
| CHILD score, N (%)                                       | A                 | 46 (47)            | 17 (31)                    | 89 (61)             | <0.0001               |
|                                                          | B                 | 39 (40)            | 21 (39)                    | 52 (36)             |                       |
|                                                          | C                 | 13 (13)            | 16 (30)                    | 5 (3)               |                       |
|                                                          | <i>Missing</i>    | 10                 | 9                          | 13                  |                       |
| Tumor classification, N (%)                              | T0                | 88 (85)            | 15 (29)                    | 0 (0)               | <0.0001               |
|                                                          | T1–T2             | 15 (14)            | 32 (63)                    | 113 (82)            |                       |
|                                                          | T3–T4             | 1 (1)              | 4 (8)                      | 25 (18)             |                       |
|                                                          | <i>Missing</i>    | 4                  | 12                         | 21                  |                       |
| TRT, N (%)                                               | No                | 9 (8)              | 48 (76)                    | 0 (0)               | <0.0001               |
|                                                          | Yes               | 99 (92)            | 15 (24)                    | 159 (100)           |                       |
| <b>Parameters and pathology at LT</b>                    |                   |                    |                            |                     |                       |
| AFP (ng/mL), median (IQR)                                |                   | 7 (4–23)           | 7 (4–17)                   | 10 (5–34)           | 0.05                  |
|                                                          | <i>Missing</i>    | 13                 | 3                          | 19                  |                       |
| Number of nodules, median (IQR)                          |                   | 1 (0–2)            | 2 (1–3)                    | 2 (1–3)             | <0.0001               |
| Diameter of the largest nodule (mm), median (IQR)        |                   | 16 (10–20)         | 25 (15–35)                 | 25 (15–30)          | <0.0001               |
| Grade of HCC, N (%)                                      | 0                 | 25 (27)            | 3 (5)                      | 8 (5)               | <0.0001               |
|                                                          | 1                 | 15 (16)            | 8 (13)                     | 11 (7)              |                       |
|                                                          | 2                 | 35 (37)            | 36 (60)                    | 77 (49)             |                       |
|                                                          | 3                 | 19 (20)            | 13 (22)                    | 61 (39)             |                       |
|                                                          | <i>Missing</i>    | 11                 | 3                          | 1                   |                       |
| Microvascular invasion, N (%)                            | No                | 79 (89)            | 44 (79)                    | 95 (61)             | <0.0001               |
|                                                          | Yes               | 10 (11)            | 12 (21)                    | 60 (39)             |                       |
|                                                          | <i>Missing</i>    | 19                 | 7                          | 4                   |                       |
| Macrovascular invasion, N (%)                            | No                | 88 (99)            | 57 (100)                   | 144 (95)            | 0.06                  |
|                                                          | Yes               | 1 (1)              | 0 (0)                      | 8 (5)               |                       |
|                                                          | <i>Missing</i>    | 19                 | 6                          | 7                   |                       |

PTs: patients, IQ: interquartile range, DG: diagnosis, LT: transplant. <sup>1</sup>Chi-square *P* for categorical variables, Wilcoxon *P* for continuous variables. <sup>2</sup>Other causes of cirrhosis include: CRIPTO, HDV, HIV, emacromatosis, Wilson disease, sclerosing cholangitis, cholangitis primary biliary, and secondary biliary cholangitis.

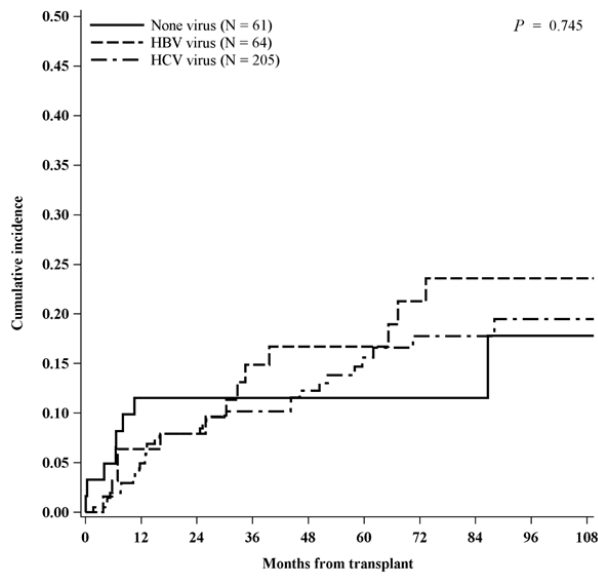

**Figure S1.** Cumulative incidence of HCC recurrence after liver transplantation for all transplanted patients, stratified between patients without HBV and HCV virus (N = 61), patients with HBV virus (N = 64), and patients with HCV or both viruses (N = 205).

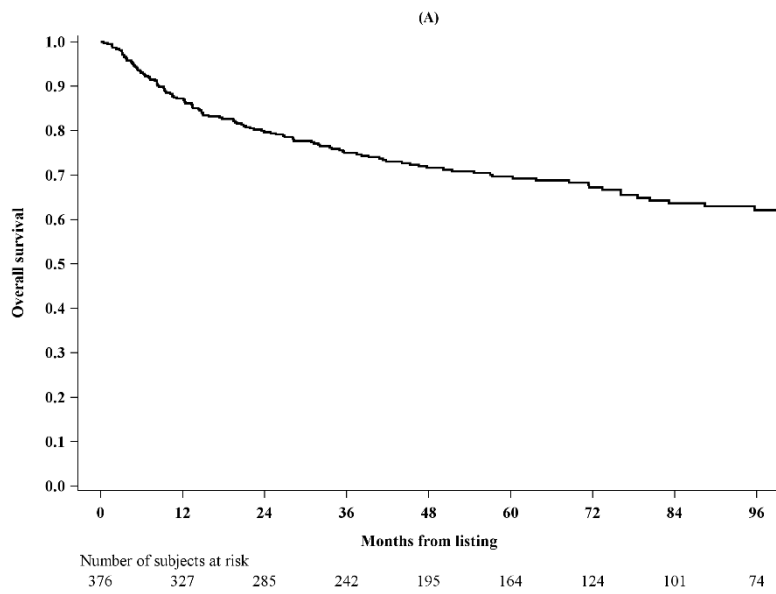

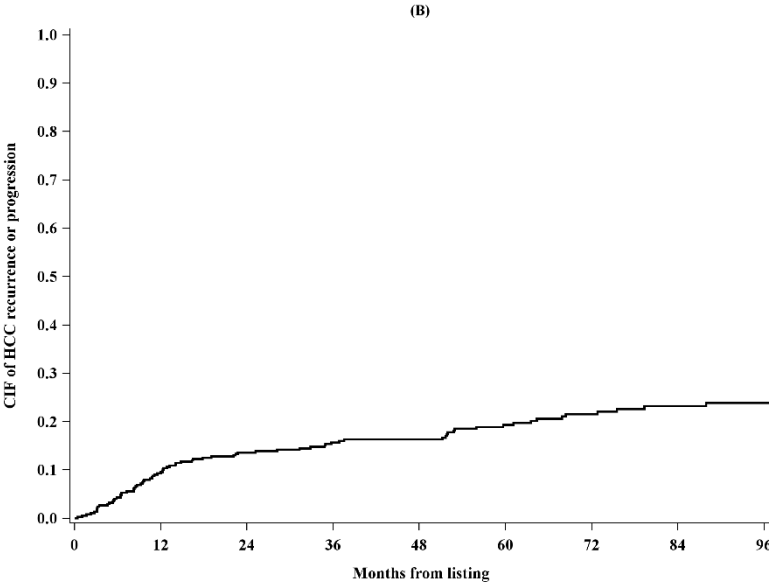

**Figure S2.** (A) Intention-to-treat survival and (B) cumulative incidence of HCC recurrence or progression from listing (N = 376).
